# Supplementary material for: The Abundance of Human Milk Oligosaccharide (HMO)-Metabolizing Genes in Fecal Samples from Six-Month-Old Human Infants
Source: MDPI journal article supplement (doi:10.3390/microorganisms9071352), 2021-06-22
Supplement: s1 [file s1]

## Supplementary Tables and Figures

Table S1: Reaction Volumes per Well

| Component                   | Per well (tot vol 15µl per rxn) |
|-----------------------------|---------------------------------|---------------------------------|---------------------------------|---------------------------------|
| Primer concentration        | 300 nM                          | 1 µM                            | 5µM                             | 12.5 µM                         |
| SYBR green <sup>1</sup>     | 7.5 µl                          | 7.5 µl                          | 7.5 µl                          | 7.5 µl                          |
| Forward Primer <sup>2</sup> | 0.045 µl                        | 0.155 µl                        | 0.75 µl                         | 1.9 µl                          |
| Reverse Primer              | 0.045 µl                        | 0.155 µl                        | 0.75 µl                         | 1.9 µl                          |
| 5ng Genomic DNA (samples)   | 2 µl                            | 2 µl                            | 2 µl                            | 2 µl                            |
| DNA-Free Water <sup>2</sup> | 5.4 µl                          | 5.2 µl                          | 4 µl                            | 1.7 µl                          |
| <b>Total</b>                | <b>15 µl</b>                    | <b>15 µl</b>                    | <b>15 µl</b>                    | <b>15 µl</b>                    |

<sup>1</sup>Applied Biosystems (Foster City, CA); <sup>2</sup>IDT (Coralville, IA)

Table S2: Conditions for qPCR

|        | B. Breve        |        | Remaining Primers |        |
|--------|-----------------|--------|-------------------|--------|
| Cycles | Temperature (C) | Time   | Temperature (C)   | Time   |
| 1x     | 94              | 30 sec | 50                | 2 min  |
| 40x    | 94              | 30 sec | 95                | 10 min |
|        | 55              | 1 min  | 95                | 45 sec |
|        | 68              | 30 sec | X <sup>1</sup>    | 45 sec |
| 1x     | 68              | 5 min  | 72                | 45 sec |
|        | 4               | HOLD   | 4                 | HOLD   |

<sup>1</sup>Where X is the primer-dependent annealing temperature

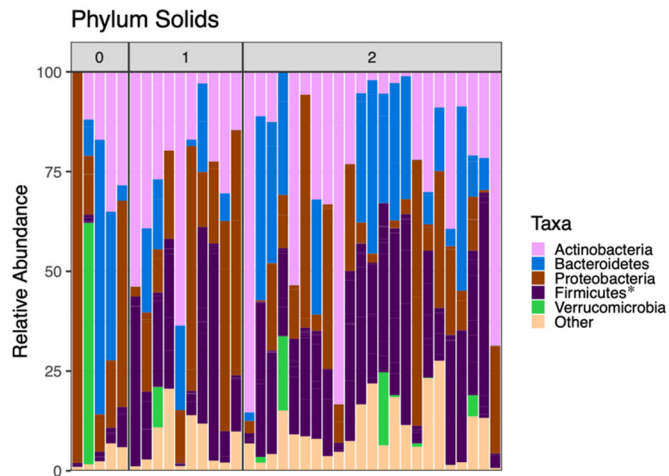

Figure S1: Phyla bar charts according to solid food intake, where 0 represents an infant consuming no solids, 1 represents and infant consuming little solids, and 2 represents and infant consuming some solids.

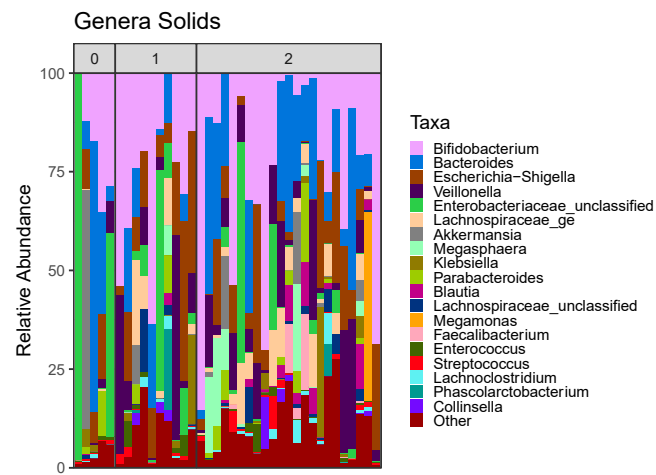

Figure S2: Genera bar charts according to solid food intake, where 0 represents an infant consuming no solids, 1 represents and infant consuming little solids, and 2 represents and infant consuming some solids.

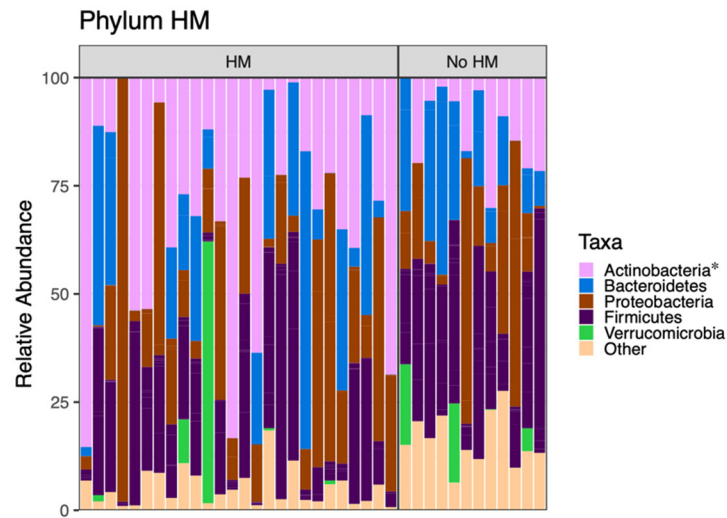

Figure S3: Phyla bar charts according to human milk intake. Infants receiving any human milk tended to have a higher abundance of Actinobacteria than those receiving no human milk at all ( $p=0.088$ ).

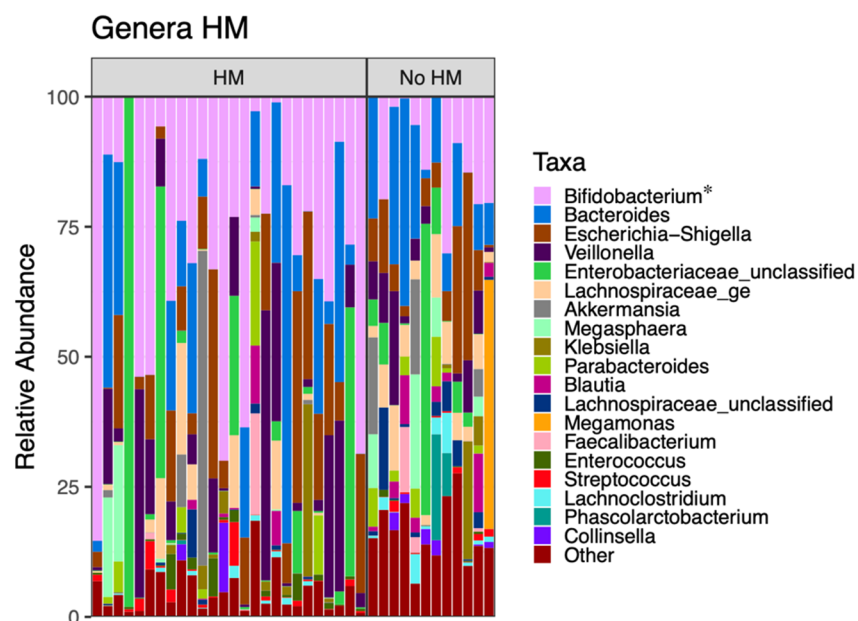

Figure S4: Genera bar charts according to human milk intake. Infants receiving any human milk tended to have a higher abundance of Bifidobacterium than those receiving no human milk at all ( $p=0.087$ ).
